# Supplementary material for: Inferring stability and persistence in the vaginal microbiome: A stochastic model of ecological dynamics
Source: PubMed Central journal article supplement (PMC10925280; doi:10.1101/2024.03.02.581600), 2024-03-03
Supplement: media-1.pdf [file media-1.pdf]

1 Supplemental Methods for “Inferring stability and persistence in the vaginal microbiome: A  
2 stochastic model of ecological dynamics”

3

4 José M. Ponciano<sup>1\*</sup>, Juan P. Gómez<sup>2</sup>, Jacques Ravel<sup>3</sup> and Larry J. Forney<sup>4</sup>

5 <sup>1</sup>Department of Biology, University of Florida, Gainesville, FL

6 <sup>2</sup>Departamento de Química y Biología, Universidad del Norte, Barranquilla, Colombia.

7 <sup>3</sup>Institute for Genome Sciences and Department of Microbiology and Immunology, University of  
8 Maryland School of Medicine, Baltimore, MD

9 <sup>4</sup>Institute for Interdisciplinary Data Science and Department of Biological Sciences, University  
10 of Idaho, Moscow, ID

11 \*Corresponding author: [josemi@ufl.edu](mailto:josemi@ufl.edu)

12

13

#### CLINICAL STUDY METHODS

14 Participants (N=135) were recruited in Birmingham, Alabama, United States of America, from

15 the Personal Health Clinic, the Jefferson County Department of Health STD Clinic, as well as

16 through advertisements in newspapers (Ravel et al. 2013). All participants in this study were

17 broadly consented following guidelines of the Human Microbiome Project of the National

18 Institutes of Health. Women between 18-45y were enrolled in the study and their ethnicities were

19 62% African American, 32% White, 5% Hispanic and 1% Asian. Women were excluded from

20 the study if they were pregnant, used the NuvaRing® for contraception, were less than 6 months

21 postpartum or breastfeeding, had chronic illnesses such as kidney failure, diabetes, or

22 HIV/AIDS, were diagnosed with an STI at enrollment, or used systemic or intravaginal

23 antibiotics or antimycotics in the 30 days prior to enrollment. At the time of enrollment, a

24 research nurse administered sensitive questionnaires. These were used to gather information on  
25 socioeconomic and demographic factors, female hygiene practices and health behaviors,  
26 gynecological and obstetrical history, sexual history and practices, sexually transmitted disease  
27 history, date of last menstrual period, methods of birth control currently used, alcohol and drug  
28 use, and fitness status and practices.

29 At the baseline visit the research nurse also assessed pelvic symptoms, performed a limited  
30 physical examination, collected biological specimens (see below), and recorded any physical  
31 findings including vaginal discharge and easily induced bleeding, and assessed the occurrence of  
32 ectopy, edema, inflammation, or ulcerations. During a pelvic examination, the nurse collected  
33 materials for the clinical assessment of BV using the Amsel 1 and Nugent criteria 2. In addition,  
34 the nurse tested for vulvovaginal candidiasis by microscopy and collected swabs that were used  
35 to test for *Trichomonas vaginalis*, *Neisseria gonorrhoeae* and *Chlamydia trachomatis* using  
36 molecular and microbiological methods. Finally, serum was collected and subsequently tested  
37 for syphilis, herpes simplex virus (HVS) type 1/2 and HIV. Positive results from any of these  
38 tests resulted in exclusion from the study. Participants were also provided detailed instructions  
39 on sample collection and storage as well as information on preparing vaginal smears.

40 At the baseline visit participants were given the materials needed to collect samples for one  
41 week. They were also provided detailed instructions on procedures to be used for the self-  
42 collection of vaginal swabs, preparation of vaginal smears, and instructions for swab storage and  
43 transport back to the clinic. Daily each subject self-collected three mid-vaginal swabs: the first  
44 Copan E-Swab was used to prepare a smear that was later Gram stained and used to determine  
45 Nugent scores. This swab was then placed in Liquid Amies Transport Media and used later used  
46 for extracting genomic DNA. In addition, subjects measured vaginal pH using the CarePlan®

47 VpH test glove (Inverness Medical). Finally, a diary was completed each day using a  
48 standardized form on which all responses were pre-coded to record hygiene practices and sexual  
49 activities. These included information on the use of sanitary napkins, tampons, and douching, as  
50 well as vaginal intercourse, receptive oral sex, digital penetration, rectal sex, sex toys or the use  
51 of diaphragms, condoms, spermicides, lubricants. Women also reported menstrual bleeding, and  
52 vaginal symptoms that included vaginal itching, discharge, odor, irritation, and pain on urination.  
53 After collection, all samples were stored in the participants' home freezers. Each week the  
54 subjects transported their samples in a cooler to the study site where they were then transferred to  
55 a -80°C freezer. At this time another one-week sampling kit was provided to the study subjects.  
56 At weeks 5 and 10, the participants completed another detailed questionnaire, and had a thorough  
57 medical evaluation that included scoring for bacterial vaginosis using Amsel and Nugent criteria.  
58 Antibiotic treatment was offered to the participants if the conditions warranted.  
59 All vaginal smears from daily sampling were Gram-stained and scored using Nugent criteria by  
60 personnel in Dr. Schwebke's laboratory at the University of Alabama. Over 9,000 slides were  
61 scored. In addition, batches of samples were shipped on dry ice to the Institute for Genome  
62 Sciences at the University of Maryland School of Medicine at weekly intervals whereupon the  
63 samples were again stored at -80°C. In total over 33,000 biological samples were collected in  
64 this study. All data from this study are managed and stored at the Institute for Genomic Research  
65 at the University of Maryland School of Medicine in a secure relational database that includes all  
66 de-identified metadata (medical evaluations, answers to all questionnaires, and daily diaries) and  
67 a system to track barcoded samples from each participant.  
68 We have demonstrated that the long-term storage of samples at -80°C does not alter the vaginal  
69 microbiome and metabolome when compared to fresh samples (Bai et al. 2012). In a previous

70 study we demonstrated that there were minimal differences between contemporaneously self-  
71 collected and physician-collected swabs samples collected from the same individual (Forney et  
72 al. 2010) as judged by the composition of vaginal communities determined by sequencing  
73 bacterial 16S rRNA genes. Others have reported similar findings (Menar et al. 2012, Nelson et  
74 al. 2003). Finally, all our methodology for DNA extraction, 16S rRNA gene amplification and  
75 sequencing and taxonomic assignments was published in Ravel et al 2013. All the data analyzed  
76 here is publicly available at NCBI's short read archive Bioproject number PRJNA208535.

77

## 78 PCA ON STABILITY METRICS AND STABILITY CLASSIFICATION

79 In the main text, Figure 5, we show a classification scheme of women according to the stability  
80 metrics estimated from fitting a MAR model to their bacterial time series data. The stability  
81 metrics for each woman computed from the parameter estimates of the two-species MAR model  
82 (*Lactobacillus* versus the rest) are shown in Table S2. These stability metrics were then used to  
83 run a PCA with the observations being each woman and the variables being the four stability  
84 metrics presented in this table. The full code for the PCA was done in R following Johnson and  
85 Wichern (2002), chapter 8 and modified from JMP's statistics multivariate statistics teaching  
86 material. It is available at [github.com/jmponciano](https://github.com/jmponciano) so that all figures are reproducible. In table S3  
87 we printed the correlation of each one of the four stability metrics with each principal  
88 component. The first three stability metrics (the variance proportion, the mean return time and  
89 the variance in the return time) have the highest negative correlation with the first principal  
90 component (PC I). The smaller the values in these three statistics, the more stable the dynamics  
91 is and the highest the PC I score. In this case, PC I explain 60.34% of the variability. PC II  
92 explains an additional 24.48% of the variance, so that together, the first two principal

93 components explain 84.82% of the variation. The fourth stability metric, reactivity, has the  
94 highest (negative) correlation with PC II. Although devising a classification scheme based on  
95 these stability metrics can be achieved in multiple ways, basing some scheme on an ecological-  
96 processes rationale gives intuitive results. For example, in the PCA plotted on the main text, we  
97 colored the different women according to a qualitative stability scale, going from “very unstable”  
98 to “very stable”. To derive such scale using ecological principles, we used each woman’s score  
99 in the first two principal components scores as well as their overall PCA score and the mean  
100 strength of density dependence (the mean of the diagonal of the B matrix) of their bacterial  
101 communities as clustering variables in a k-means cluster. We set  $k=4$ . As with any cluster  
102 analysis, many different variables can be used to obtain a clustering/grouping scheme and the  
103 following is but one of the possible ways of achieving such grouping.

104 The cluster means are shown in Table S4. Women with the highest score in PC I, which were  
105 the women with the lowest (on average) first three stability metrics and hence the women with  
106 the highest stability consistently appeared grouped in cluster 1. Those women also have on  
107 average the lowest mean density-dependent coefficient. Recall that the smaller that coefficient,  
108 the stronger the self-regulation (intra-specific density dependence) which according to Ives et al  
109 (2003) is also consistent with a more stable stochastic population dynamics. Hence, we  
110 classified the bacterial dynamics in these women as “highly stable”. Women in cluster 3 had  
111 on average the next highest score in PC I and the second smallest (on average) strength of  
112 density dependence. Hence, we classified the bacterial population dynamics in these women as  
113 “stable”. The dynamics of the bacterial communities in women on cluster 2 had the second  
114 highest average density-dependent coefficient, nearing the value of 1, which represents  
115 unregulated (density-independent) growth. The bacterial communities of these women also had

116 an average PC I score that ranked third, following that of clusters 1 and 2, which means that the  
117 first three stability metrics estimates are higher than the rest, hence less stable. Finally, the  
118 communities in cluster 4 had PC scores that were the lowest on average and the highest mean  
119 density-dependence coefficient which neared 1 (0.98, see table S4). Hence, we labeled these  
120 communities as highly unstable. All analyses and documentation can be found in the R  
121 programs in [github.com/jmponciano](https://github.com/jmponciano).

SUPPLEMENTARY FIGURES

122

123 CAPTIONS:

124

125 **Figure S1:** Simulated populations trajectory during 70 days for a three-species community, and  
126 estimates of the interaction strengths. Panels A.) and B.) show the abundances on the left and the  
127 relative abundances on the right for the same simulation. Inset on B.) is a diagram representing  
128 the structure of the community using one color per species as in the plots. In this particular  
129 simulation setting, all the interactions were weak. The parameter values for the simulation are  
130 shown in Supplementary Table 1. Panels C.) and D.) show the boxplots of the relative bias of the  
131 estimates of all the interaction strengths between all species (the  $B_{ij}$ ,  $i = 1,2,3$ ) obtained using  
132 the total abundances on the left and the relative abundances on the right. To do these boxplots,  
133 1000 simulations under this particular community structure and parameter values were done.  
134 Boxplots centered around the dotted gray line at 1 denote unbiased estimates. See text for details.

135

136 **Figure S2:** Simulated populations trajectory during 70 days for a three-species community, and  
137 estimates of the interaction strengths. Panels A.) and B.) show the abundances on the left and the  
138 relative abundances on the right for the same simulation. Inset on B.) is a diagram representing  
139 the structure of the community using one color per species as in the plots. In this particular  
140 simulation setting, all the interactions were weak except for the strength of intra-specific  
141 competition, or density dependence, for species 3. The parameter values for the simulation are  
142 shown in Supplementary Table 1. Panels C.) and D.) show the boxplots of the relative bias of the  
143 estimates of all the interaction strengths between all species (the  $B_{ij}$ ,  $i = 1,2,3$ ) obtained using  
144 the total abundances on the left and the relative abundances on the right. To do these boxplots,

145 1000 simulations under this particular community structure and parameter values were done.  
146 Boxplots centered around the dotted gray line at 1 denote unbiased estimates. See text for details.

147

148 **Figure S3:** Simulated populations trajectory during 70 days for a three-species community, and  
149 estimates of the interaction strengths. Panels A.) and B.) show the abundances on the left and the  
150 relative abundances on the right for the same simulation. Inset on B.) is a diagram representing  
151 the structure of the community using one color per species as in the plots. In this particular  
152 simulation setting, all the interactions were weak except for the strength of inter-specific  
153 competition, from species 2 to species 3 and 1. The parameter values for the simulation are  
154 shown in Supplementary Table 1. Panels C.) and D.) show the boxplots of the relative bias of the  
155 estimates of all the interaction strengths between all species (the  $B_{ij}$ ,  $i = 1,2,3$ ) obtained using  
156 the total abundances on the left and the relative abundances on the right. To do these boxplots,  
157 1000 simulations under this particular community structure and parameter values were done.

158 Boxplots centered around the dotted gray line at 1 denote unbiased estimates. See text for details.

159

160 **Figure S4:** Simulated populations trajectory during 70 days for a three-species community, and  
161 estimates of the interaction strengths. Panels A.) and B.) show the abundances on the left and the  
162 relative abundances on the right for the same simulation. Inset on B.) is a diagram representing  
163 the structure of the community using one color per species as in the plots. In this particular  
164 simulation setting, all inter-specific interactions were weak and all intra-specific interactions, or  
165 density dependence values, were strong. The parameter values for the simulation are shown in  
166 Supplementary Table 1. Panels C.) and D.) show the boxplots of the relative bias of the estimates  
167 of all the interaction strengths between all species (the  $B_{ij}$ ,  $i = 1,2,3$ ) obtained using the total



168 abundances on the left and the relative abundances on the right. To do these boxplots, 1000  
169 simulations under this particular community structure and parameter values were done. Boxplots  
170 centered around the dotted gray line at 1 denote unbiased estimates. See text for details.

171

172 **Figure S5:** When the relative abundance of *Lactobacillus* dwindles down below a 0.5  
173 proportion, the bacterial community is under a high risk of infection by HIV (Klatt et al 2017).  
174 On the other hand, as the relative abundance of *Lactobacillus* moves above 0.5, the risk of  
175 infection decreases. Seeking to elucidate which type and magnitude of ecological interactions  
176 would lead to desirable dynamics (i.e. fluctuations in relative abundance of *Lactobacillus* above  
177 0.5) is a reachable target under our analysis using the MAR model.

178

179 **Figure S6.** Variability across women of the interaction relationships between three groups of  
180 species. This figure illustrates the wide variability of interaction coefficients within the same  
181 pair of species for our three-species model fit, where all *Lactobacillus* were grouped together,  
182 *Gardnerella* was kept as a separate second species and all the other species as a third functional  
183 group. Take for instance the two-way interaction strengths between *Gardnerella* and  
184 *Lactobacillus*. Across all 88 women, one sees interaction strengths in all quadrants: +/+, +/-, -/+  
185 and -/-.

186

187

188

189

190

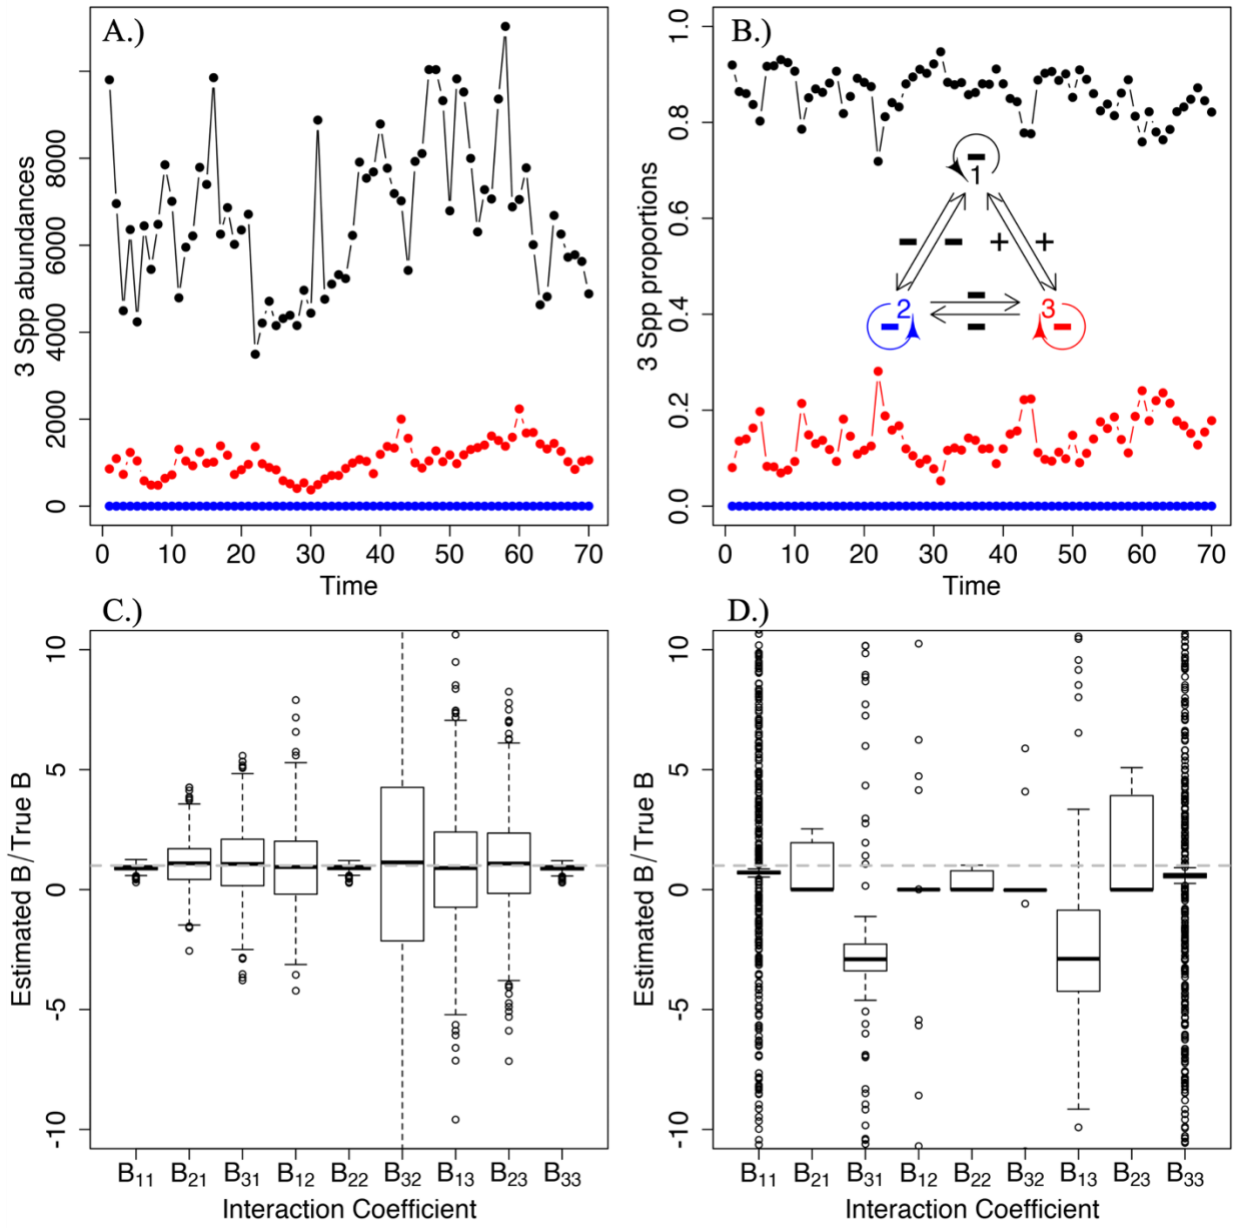

192

193

194

195

196

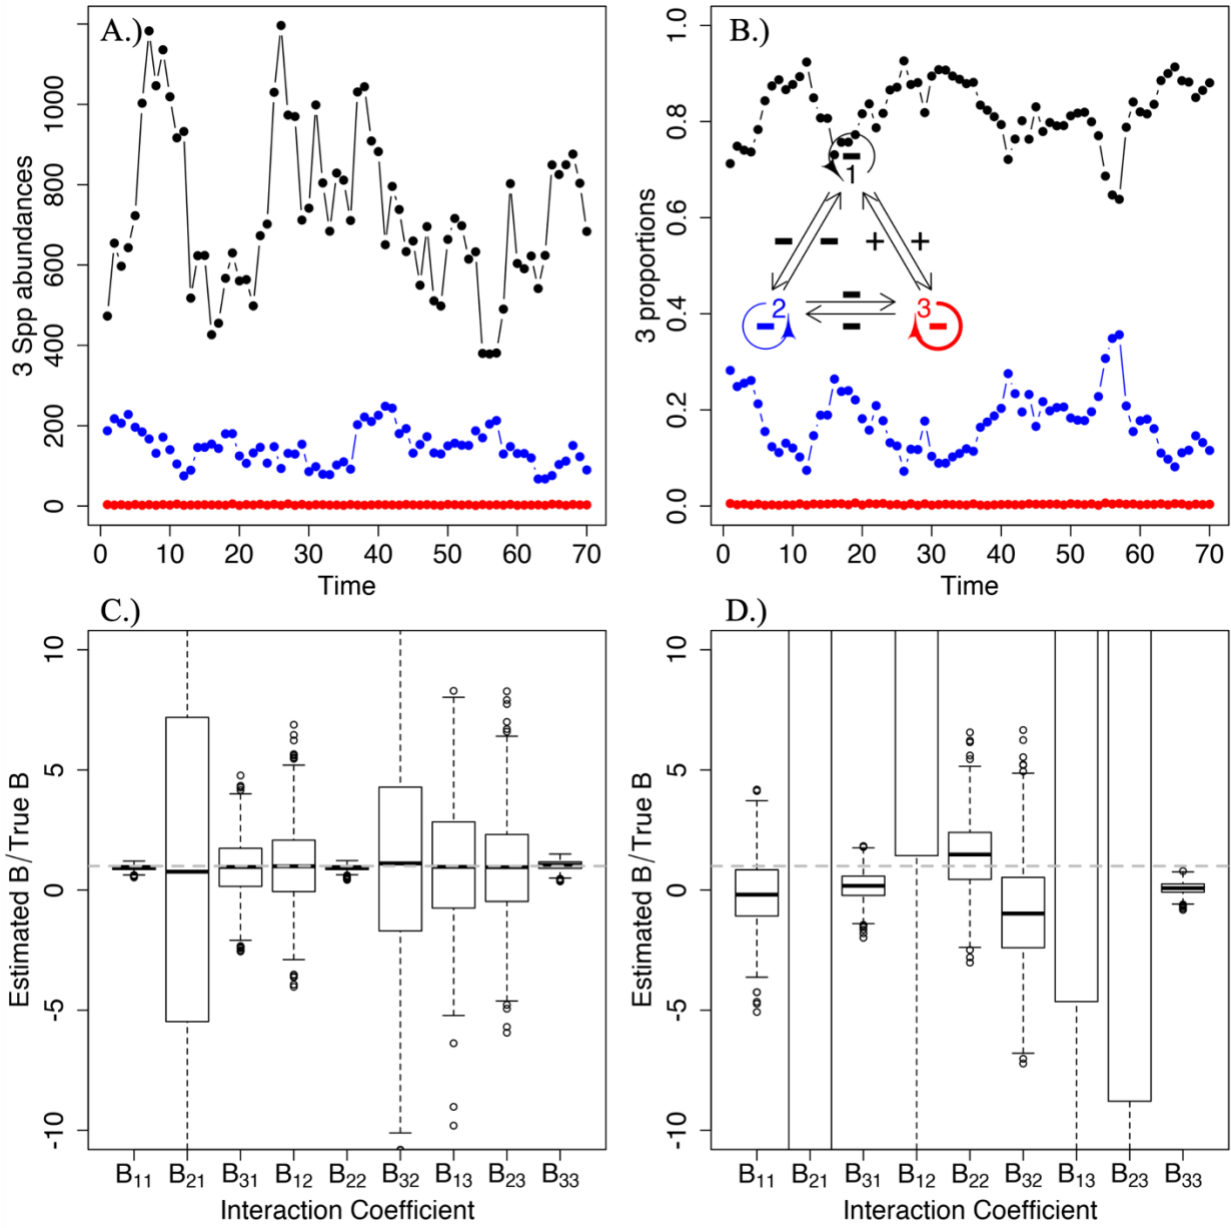

198

199

200

201

202

203

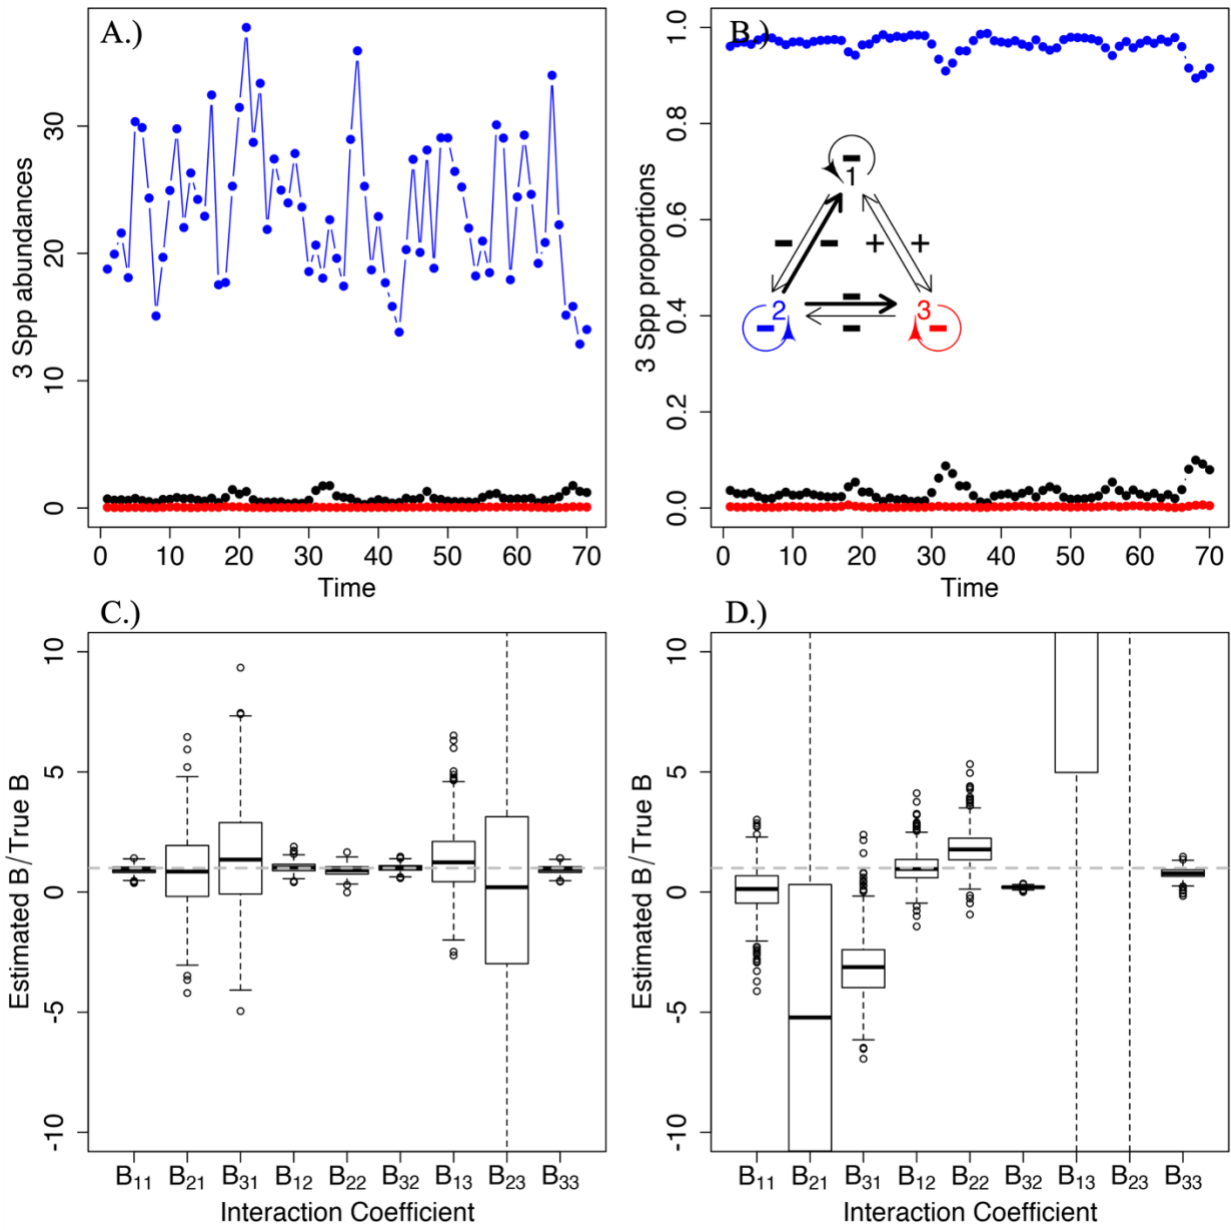

205

206

207

208

209

210

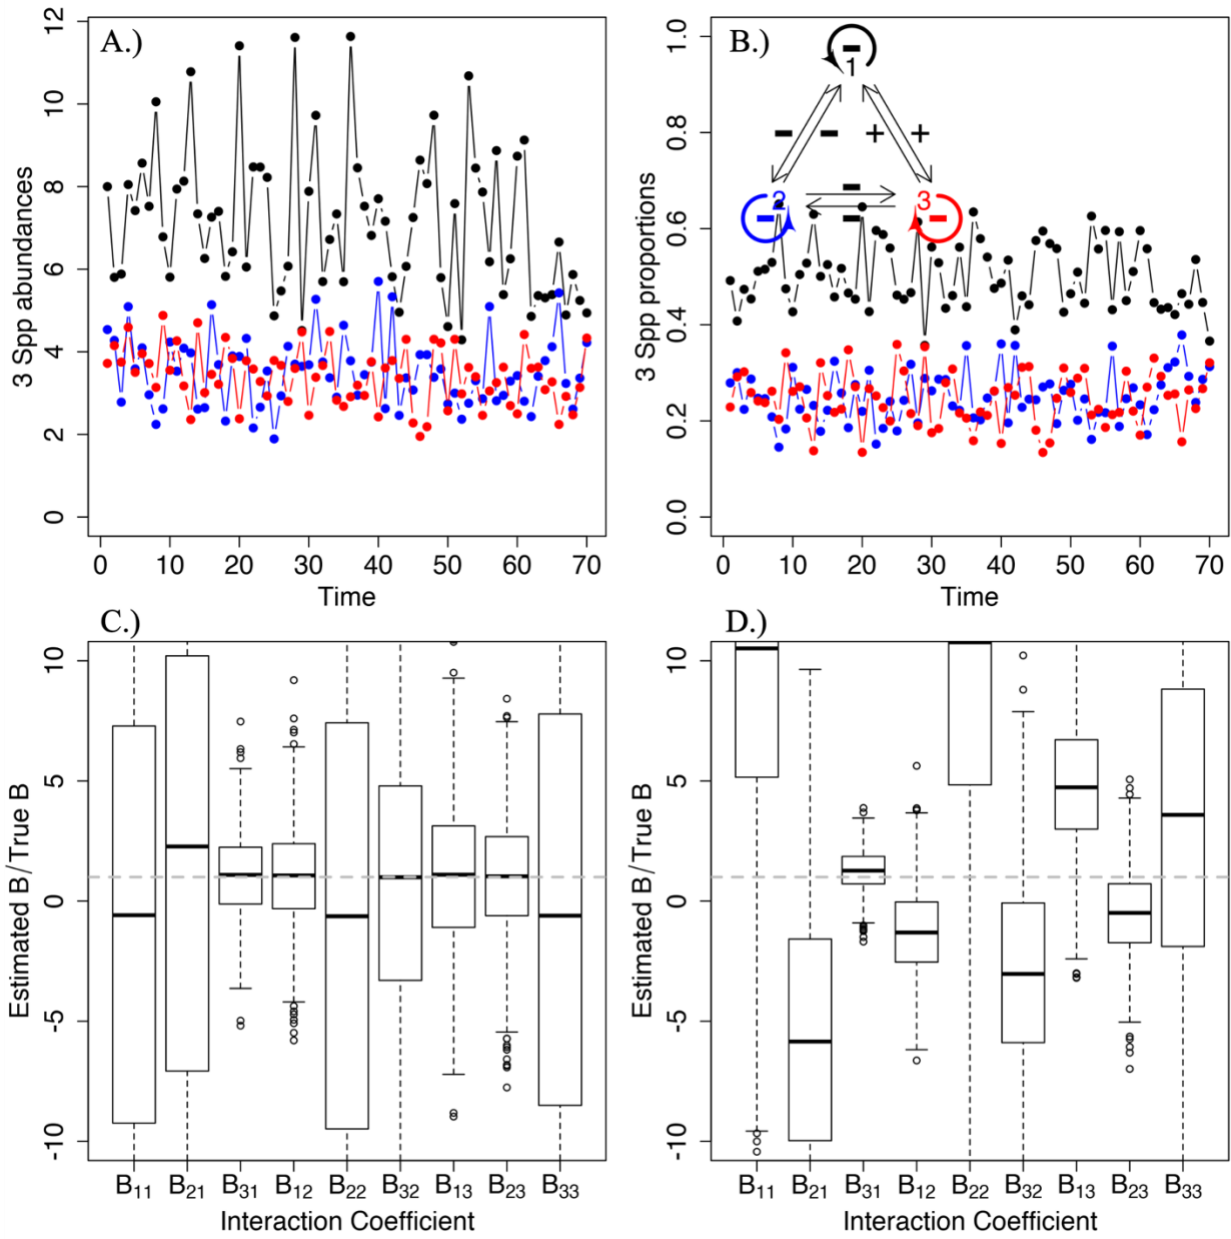

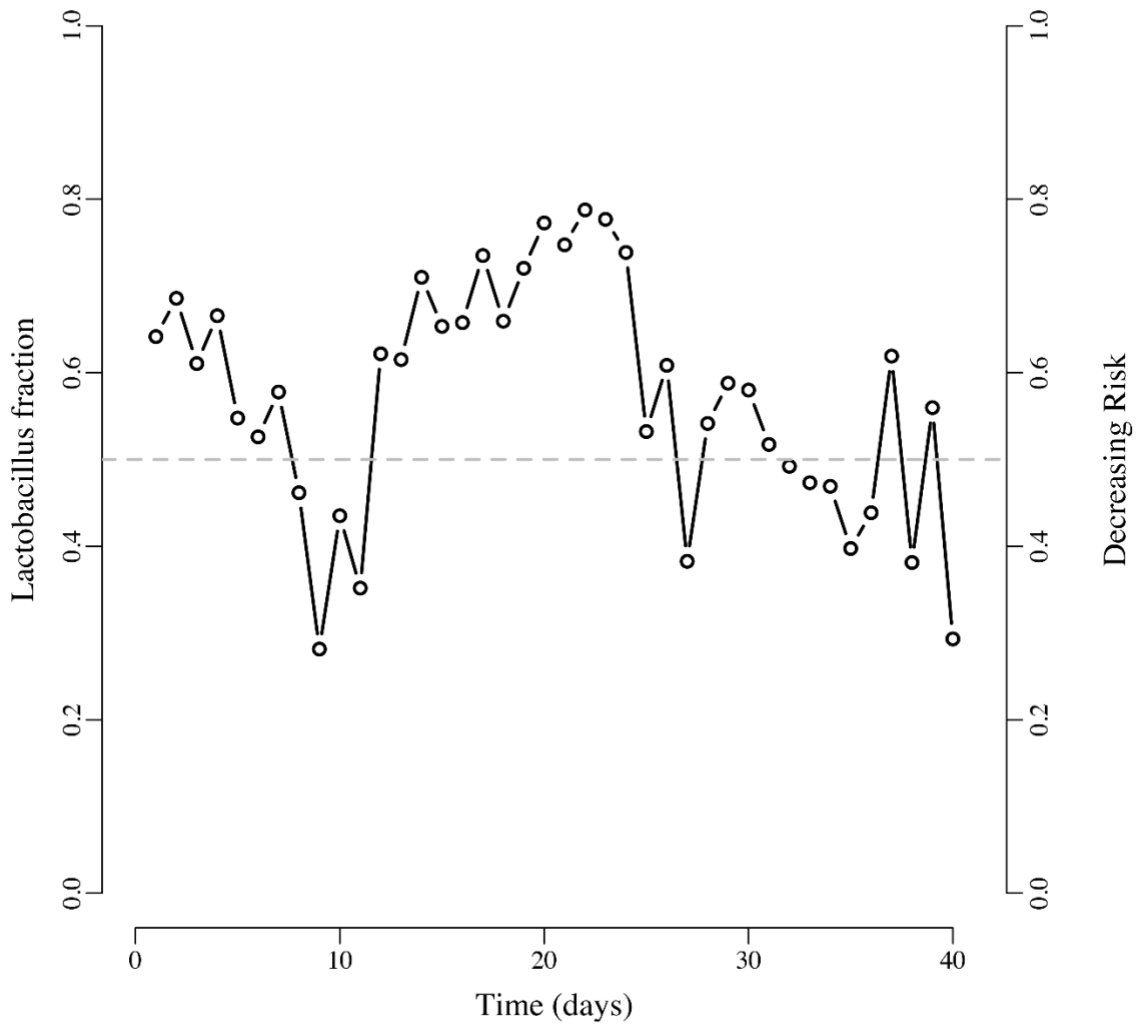

214

215

216

217

218

219

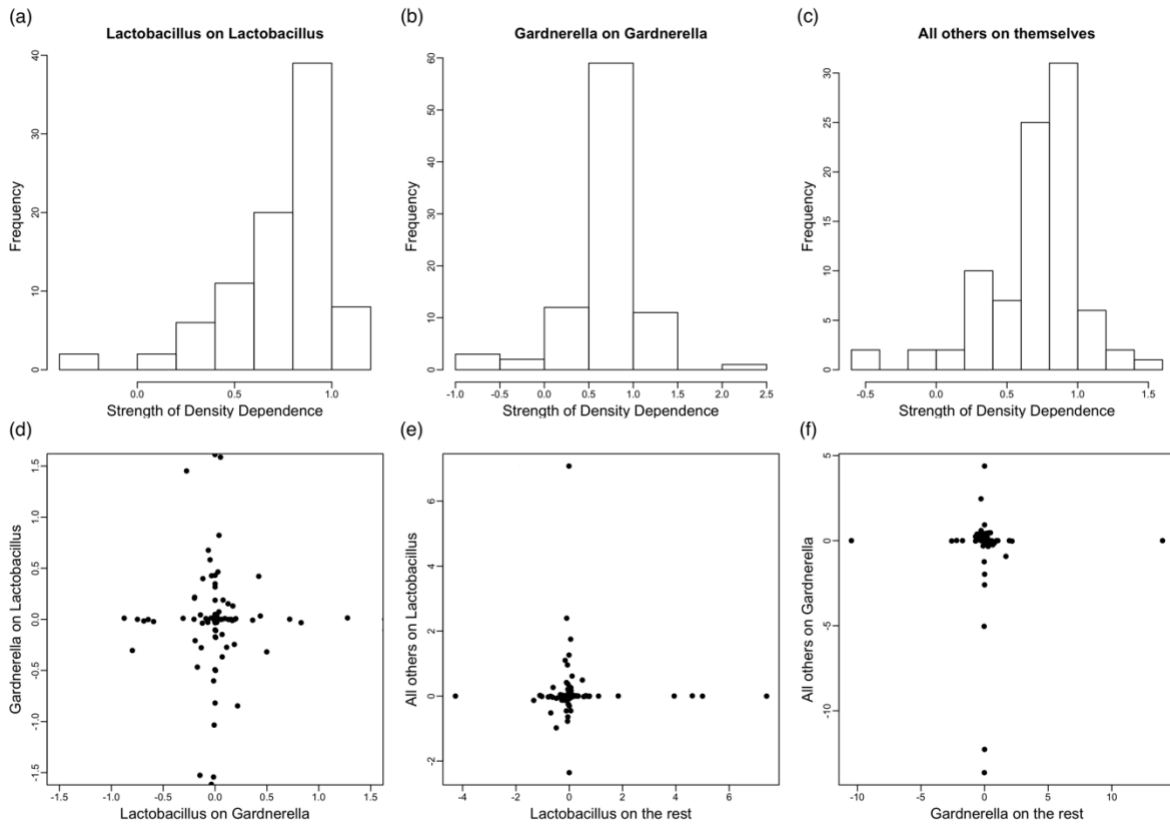

221

222

SUPPLEMENTARY TABLES

223  
224  
225  
226  
227  
228  
229  
230  
231  
232  
233  
234  
235  
236  
237  
238  
239  
240  
241  
242  
243  
244  
245

Table S1. Parameters used in the simulation of the three species community time series based on four different scenarios (see main text, Figure 2 and Figures S1-S4). The first row corresponds to the vector of maximum growth rates for every species. The next three rows correspond to the values used for the variance-covariance matrix of the environmental variation and finally, the next four sets of three rows correspond each to the matrix of interaction coefficients B. The (i,j) element in these 3 by 3 tables correspond to the effect of species j on the growth rate of species i.

|                                          | Species 1 | Species 2 | Species 3 |
|------------------------------------------|-----------|-----------|-----------|
| <hr style="border: 0.5px solid black;"/> |           |           |           |
| <b>A</b>                                 | 1.9       | 1.3       | 1.1       |
| <b><math>\Sigma</math></b>               |           |           |           |
| Species 1                                | 0.05      | 0.005     | 0.005     |
| Species 2                                | 0.005     | 0.05      | 0.005     |
| Species 3                                | 0.005     | 0.005     | 0.05      |
| matrix, scenario 1                       |           |           |           |
| Species 1                                | 0.75      | -0.06     | 0.04      |
| Species 2                                | -0.1      | 0.75      | -0.05     |
| Species 3                                | 0.07      | -0.02     | 0.75      |



246 **B** matrix, scenario 2

|     |           |       |       |       |
|-----|-----------|-------|-------|-------|
| 247 | Species 1 | 0.75  | -0.06 | 0.04  |
| 248 | Species 2 | -0.01 | 0.75  | -0.05 |
| 249 | Species 3 | 0.07  | -0.02 | -0.5  |

250

251 **B** matrix, scenario 3

|     |           |       |       |       |
|-----|-----------|-------|-------|-------|
| 252 | Species 1 | 0.55  | -0.60 | 0.07  |
| 253 | Species 2 | -0.06 | 0.55  | -0.02 |
| 254 | Species 3 | 0.04  | -0.75 | 0.55  |

255

256 **B** matrix, scenario 4

|     |           |       |       |       |
|-----|-----------|-------|-------|-------|
| 257 | Species 1 | 0.01  | -0.06 | 0.04  |
| 258 | Species 2 | -0.01 | 0.01  | -0.05 |
| 259 | Species 3 | 0.07  | -0.02 | 0.01  |

260 

---

261

262

263 Table S2. Stability metrics for each woman computed from the parameter estimates of the two-  
 264 species MAR model (Lactobacillus versus the rest)

265

| <b>Individual</b> | <b>Variance<br/>Proportion</b> | <b>Mean<br/>Return<br/>Time</b> | <b>Variance<br/>Return<br/>Time</b> | <b>Reactivity</b> |
|-------------------|--------------------------------|---------------------------------|-------------------------------------|-------------------|
| woman1            | 0.610                          | 0.973                           | 0.946                               | -0.018            |
| woman2            | 0.676                          | 0.962                           | 0.926                               | -0.034            |
| woman3            | 0.167                          | 0.954                           | 0.910                               | -0.719            |
| woman4            | 0.127                          | 0.919                           | 0.845                               | -0.077            |
| woman5            | 0.767                          | 0.998                           | 0.996                               | -0.561            |
| woman6            | 0.134                          | 0.997                           | 0.993                               | -0.064            |
| woman7            | 0.920                          | 1.004                           | 1.009                               | 2.793             |
| woman8            | 0.739                          | 0.927                           | 0.860                               | -0.115            |
| woman10           | 0.598                          | 0.879                           | 0.773                               | -0.147            |
| woman11           | 0.842                          | 0.997                           | 0.993                               | -7.613            |
| woman13           | 0.691                          | 0.989                           | 0.978                               | -0.016            |
| woman14           | 0.012                          | 0.782                           | 0.612                               | -0.011            |
| woman15           | 0.307                          | 0.935                           | 0.875                               | -0.215            |
| woman16           | 0.332                          | 0.897                           | 0.805                               | -0.039            |
| woman17           | 0.346                          | 0.992                           | 0.983                               | -0.184            |
| woman18           | 0.607                          | 0.995                           | 0.989                               | -16.015           |
| woman19           | 0.569                          | 0.998                           | 0.996                               | -36.740           |

|         |       |       |       |          |
|---------|-------|-------|-------|----------|
| woman21 | 0.700 | 0.995 | 0.991 | -2.040   |
| woman22 | 0.910 | 0.994 | 0.988 | -6.360   |
| woman23 | 0.461 | 0.965 | 0.932 | -0.160   |
| woman26 | 0.480 | 0.968 | 0.937 | -0.300   |
| woman27 | 0.046 | 0.974 | 0.948 | -0.951   |
| woman28 | 0.501 | 0.998 | 0.996 | -20.550  |
| woman29 | 0.541 | 0.949 | 0.901 | -0.382   |
| woman30 | 0.001 | 0.348 | 0.121 | -2.881   |
| woman31 | 0.007 | 0.588 | 0.346 | -0.034   |
| woman35 | 0.534 | 0.957 | 0.916 | -0.842   |
| woman36 | 0.153 | 0.974 | 0.948 | -0.002   |
| woman38 | 0.053 | 0.995 | 0.990 | -3.389   |
| woman39 | 0.555 | 0.996 | 0.991 | -184.750 |
| woman41 | 0.657 | 0.997 | 0.995 | -0.159   |
| woman42 | 0.530 | 0.905 | 0.819 | -0.030   |
| woman43 | 0.486 | 0.986 | 0.971 | -0.002   |
| woman44 | 0.232 | 0.870 | 0.757 | -0.063   |
| woman46 | 0.410 | 0.946 | 0.895 | -1.742   |
| woman47 | 0.291 | 0.752 | 0.566 | -0.040   |
| woman48 | 0.624 | 0.967 | 0.935 | -0.926   |
| woman49 | 0.718 | 0.940 | 0.884 | -0.427   |
| woman50 | 0.002 | 0.753 | 0.567 | -0.079   |
| woman52 | 0.197 | 0.906 | 0.820 | -0.167   |

|         |       |       |       |        |
|---------|-------|-------|-------|--------|
| woman53 | 0.761 | 0.932 | 0.872 | -0.488 |
| woman55 | 0.369 | 0.945 | 0.893 | -0.048 |
| woman56 | 0.116 | 0.886 | 0.784 | -0.006 |
| woman58 | 0.560 | 0.925 | 0.855 | -0.008 |
| woman59 | 0.513 | 0.832 | 0.716 | -0.141 |
| woman60 | 0.421 | 0.847 | 0.718 | -0.087 |
| woman61 | 0.305 | 0.921 | 0.847 | -0.452 |
| woman62 | 0.414 | 0.986 | 0.971 | -0.002 |
| woman65 | 0.001 | 0.865 | 0.748 | -2.620 |
| woman66 | 0.084 | 0.984 | 0.968 | -0.019 |
| woman69 | 0.290 | 0.819 | 0.672 | -0.181 |
| woman70 | 0.510 | 0.925 | 0.856 | -0.230 |
| woman71 | 0.402 | 0.962 | 0.926 | -0.890 |
| woman75 | 0.499 | 0.908 | 0.824 | -0.062 |
| woman76 | 0.523 | 0.917 | 0.841 | -0.020 |
| woman77 | 0.812 | 0.949 | 0.901 | -0.042 |
| woman79 | 0.741 | 1.003 | 1.006 | 0.023  |
| woman82 | 0.446 | 0.989 | 0.977 | -0.046 |
| woman83 | 0.107 | 0.762 | 0.580 | -0.110 |
| woman87 | 0.686 | 0.997 | 0.993 | -0.232 |
| woman88 | 0.142 | 0.797 | 0.635 | -0.074 |
| woman90 | 0.848 | 1.010 | 1.021 | -0.008 |
| woman92 | 0.478 | 0.936 | 0.877 | -0.012 |

|          |       |       |       |        |
|----------|-------|-------|-------|--------|
| woman93  | 0.330 | 0.758 | 0.574 | -0.069 |
| woman96  | 0.759 | 0.959 | 0.919 | -0.026 |
| woman97  | 0.609 | 0.928 | 0.862 | -0.053 |
| woman101 | 0.001 | 0.934 | 0.872 | -0.026 |
| woman102 | 0.015 | 0.983 | 0.966 | -0.031 |
| woman103 | 0.325 | 0.899 | 0.809 | -0.034 |
| woman112 | 0.527 | 0.932 | 0.869 | -0.662 |
| woman114 | 0.126 | 0.935 | 0.874 | -0.218 |
| woman115 | 0.136 | 0.794 | 0.630 | -4.959 |
| woman116 | 0.239 | 0.957 | 0.915 | -0.868 |
| woman117 | 0.808 | 0.996 | 0.993 | -0.082 |
| woman118 | 0.556 | 0.928 | 0.862 | -0.118 |
| woman119 | 0.307 | 0.971 | 0.942 | -0.025 |
| woman120 | 0.486 | 0.961 | 0.923 | -0.006 |
| woman121 | 0.572 | 0.960 | 0.921 | -0.105 |
| woman122 | 0.329 | 0.996 | 0.992 | -5.526 |
| woman124 | 0.692 | 0.977 | 0.954 | -0.028 |
| woman125 | 0.811 | 0.997 | 0.994 | -0.188 |
| woman126 | 0.001 | 0.828 | 0.686 | -0.020 |
| woman128 | 0.711 | 0.998 | 0.996 | -0.793 |
| woman129 | 0.522 | 0.850 | 0.723 | -0.010 |
| woman130 | 0.744 | 0.970 | 0.941 | -0.303 |
| woman131 | 0.098 | 0.792 | 0.626 | -0.171 |

|          |       |       |       |        |
|----------|-------|-------|-------|--------|
| woman134 | 0.029 | 0.894 | 0.800 | -1.005 |
| woman135 | 0.793 | 1.000 | 1.000 | -0.006 |

---

267 Table S3. Correlation of each one of the four stability metrics with each principal component.

268 The data for the PCA is shown in table S2 above.

269

| <b>Variable</b>     | <b>PC1</b> | <b>PC2</b> | <b>PC3</b> | <b>PC4</b> |
|---------------------|------------|------------|------------|------------|
| Variance Proportion | -0.729     | -0.096     | 0.678      | 0.003      |
| Mean Return time    | -0.956     | -0.068     | -0.278     | 0.071      |
| Variance Return     |            |            |            |            |
| time                | -0.966     | -0.054     | -0.243     | -0.073     |
| Reactivity          | 0.190      | -0.981     | -0.034     | -0.001     |

270

271

272 Table S4. Centroids from each cluster resulting from a k-means cluster (k=4) of the 88 women  
 273 with four variables. The variables were: the PC I and II scores, the overall PCA standardized  
 274 score (the eigenvector times the standardized values, eq. 8-29 Johnson and Wichern (2002)) and  
 275 the average density-dependent coefficient in the bacterial community (the average of the  
 276 diagonal entries in the **B** matrix of the MAR model). As with any cluster analysis, many  
 277 different variables can be used to obtain a clustering/grouping scheme and the following is but  
 278 one of the possible ways of achieving such grouping.

| <b>Clusters</b> | <b>Scaled Scores 1</b> | <b>Scaled Scores 2</b> | <b>PCA scores</b> | <b>Mean ddp</b> |
|-----------------|------------------------|------------------------|-------------------|-----------------|
| 1               | 0.223                  | 0.027                  | 2.071             | 0.521           |
| 2               | -0.016                 | -0.018                 | -0.226            | 0.786           |
| 3               | 0.056                  | 0.057                  | 0.586             | 0.690           |
| 4               | -0.090                 | -0.020                 | -0.780            | 0.906           |

279

280



281

SUPPLEMENTARY REFERENCES

- 282 Bai, Guoyun, Pawel Gajer, Melissa Nandy, Bing Ma, Hongqiu Yang, Joyce Sakamoto, May H.  
283 Blanchard, Jacques Ravel, and Rebecca M. Brotman. 2012. “Comparison of Storage  
284 Conditions for Human Vaginal Microbiome Studies.” *PLOS ONE* 7 (5): e36934.  
285 <https://doi.org/10.1371/journal.pone.0036934>.
- 286 Forney, Larry J., Pawel Gajer, Christopher J. Williams, G. Maria Schneider, Sara S. K. Koenig,  
287 Stacey L. McCulle, Shara Karlebach, et al. 2010. “Comparison of Self-Collected and  
288 Physician-Collected Vaginal Swabs for Microbiome Analysis.” *Journal of Clinical*  
289 *Microbiology* 48 (5): 1741–48. <https://doi.org/10.1128/jcm.01710-09>.
- 290 Ravel, Jacques, Rebecca M. Brotman, Pawel Gajer, Bing Ma, Melissa Nandy, Douglas W.  
291 Fadrosh, Joyce Sakamoto, et al. 2013. “Daily Temporal Dynamics of Vaginal Microbiota  
292 before, during and after Episodes of Bacterial Vaginosis.” *Microbiome* 1 (1): 29.  
293 <https://doi.org/10.1186/2049-2618-1-29>.  
294
